# Supplementary material for: Exploring the Potential for Utilization of Medium and Highly Sulfidic Mine Tailings in Construction Materials: A Review
Source: MDPI journal article supplement (doi:10.3390/su132112150), 2021-11-03
Supplement: s1 [file s1]

Archive with 1 entries (1 files):
- sustainability-1416626-supplementary.pdf
