# Supplementary material for: Exploring the Potential for Utilization of Medium and Highly Sulfidic Mine Tailings in Construction Materials: A Review
Source: MDPI journal article supplement (doi:10.3390/su132112150), 2021-11-03
Supplement: s1 [file s1 › sustainability-1416626-supplementary.pdf]

## Exploring the Potential for Utilization of Medium and Highly Sulfidic Mine Tailings in Construction Materials: a Review

Natalia Pires Martins<sup>1\*</sup>, Sumit Srivastava<sup>2</sup>, Francisco Veiga Simão<sup>3,4,5</sup>, He Niu<sup>2</sup>, Priyadharshini Perumal<sup>2</sup>,  
Ruben Snellings<sup>6</sup>, Mirja Illikainen<sup>2</sup>, Hilde Chambart<sup>3</sup>, Guillaume Habert<sup>1</sup>

<sup>1</sup> ETH Zürich, Chair of Sustainable Construction, Stefano-Franscini-Platz 5, 8093 Zürich (Switzerland)

<sup>2</sup> University of Oulu, Fibre and Particle Engineering Research Unit, P.O. Box 8000, FI-90014 (Finland)

<sup>3</sup> Wienerberger NV, Central Laboratory for Clay Roof Tiles, 8500 Kortrijk (Belgium)

<sup>4</sup> KU Leuven, Research Centre for Economics and Corporate Sustainability, 1000 Brussels (Belgium)

<sup>5</sup> KU Leuven, Division of Geology, Department of Earth and Environmental Sciences, 3001 Leuven (Belgium)

<sup>6</sup> VITO, Sustainable Materials Management, Boeretang 200, 2400 Mol (Belgium)

\*Correspondence: [martins@ibi.baug.ethz.ch](mailto:martins@ibi.baug.ethz.ch)

### ORCID:

Natalia Pires Martins: 0000-0001-5648-6765

Sumit Srivastava: 0000-0001-9706-4825

Francisco Veiga Simão: 0000-0001-7119-0700

He Niu: 0000-0001-9424-1937

Priyadharshini Perumal: 0000-0002-7731-2016

Ruben Snellings: 0000-0002-4354-4871

Mirja Illikainen: 0000-0001-7545-4574

Hilde Chambart: (none)

Guillaume Habert: 0000-0003-3533-7896

**Table S-1.** Highlights of publications on the effect of minor elements in ye'elimite containing cements.

| Ref. | Type of cement used                                          | Effect on                                 | Method                                                                                                                                                                                                                                                                                                           | Trace elements | Effects observed                                                                                                                                                                                                                                                                     |
|------|--------------------------------------------------------------|-------------------------------------------|------------------------------------------------------------------------------------------------------------------------------------------------------------------------------------------------------------------------------------------------------------------------------------------------------------------|----------------|--------------------------------------------------------------------------------------------------------------------------------------------------------------------------------------------------------------------------------------------------------------------------------------|
| [1]  | pure ye'elimite, without gypsum and with 20% gypsum addition | Hydration                                 | dissolution of metal salts (Pb(NO <sub>3</sub> ) <sub>2</sub> , Cr(NO <sub>3</sub> ) <sub>3</sub> ·9H <sub>2</sub> O, Cu(NO <sub>3</sub> ) <sub>2</sub> ·3H <sub>2</sub> O, Zn(NO <sub>3</sub> ) <sub>2</sub> ·6H <sub>2</sub> O) in mixing water at a concentration of 0.1 or 0.5 mol L <sup>-1</sup>           | Pb             | In the samples of pure C4A3S, strong hydration retardation was observed; in the samples containing gypsum, hydration acceleration was observed; modification of hydration mechanism (ettringite formed instead of Afm and AH3)                                                       |
|      |                                                              |                                           |                                                                                                                                                                                                                                                                                                                  | Cr             | acceleration of hydration, especially in the pure C4A3S samples; modification of hydration mechanism (ettringite formed instead of Afm and AH3)                                                                                                                                      |
|      |                                                              |                                           |                                                                                                                                                                                                                                                                                                                  | Cu             | pure C4A3S: strong impact on early hydration; acceleration but much lower hydration degree, reduced ettringite formation. Lower heat release and mass loss in the sample containing gypsum. Modification of hydration mechanism (ettringite formed instead of Afm and AH3)           |
|      |                                                              |                                           |                                                                                                                                                                                                                                                                                                                  | Zn             | pure C4A3S: acceleration. C4A3S + gypsum: slight retardation. Impact is less significant than other heavy metals on both systems                                                                                                                                                     |
| [2]  | CSA clinker + 20 or 30% phosphogypsum                        | hydration, immobilization                 | Cr added at 65 g/kg as Na <sub>2</sub> CrO <sub>4</sub> ·4H <sub>2</sub> O (Cr <sup>6+</sup> ) and Cr(NO <sub>3</sub> ) <sub>3</sub> ·9H <sub>2</sub> O (Cr <sup>3+</sup> )                                                                                                                                      | Cr 6+          | immobilization is higher at 20% gypsum                                                                                                                                                                                                                                               |
|      |                                                              |                                           |                                                                                                                                                                                                                                                                                                                  | Cr 3+          | efficient immobilization regardless of gypsum content                                                                                                                                                                                                                                |
| [3]  | synthetic CSA clinker and pure synthetic ye'elimite          | immobilization                            | Pb added at PbO <sub>2</sub> (0-33.71 wt%) to the raw meal                                                                                                                                                                                                                                                       | Pb             | Ye'elimite XRD peaks continuously shifted to the left as Pb addition increases; simulations suggest the preferential substitution of Pb in Ca sites in ye'elimite, rather than ferrite or belite                                                                                     |
| [4]  | synthetic alite-belite-ye'elimite clinker + 14% anhydrite    | mineralogy, hydration                     | CaF <sub>2</sub> , B <sub>2</sub> O <sub>3</sub> , Na <sub>2</sub> O, and K <sub>2</sub> O (1-2 wt%) added to the clinker raw meal as ZnSO <sub>4</sub> ·H <sub>2</sub> O, Na <sub>2</sub> B <sub>4</sub> O <sub>7</sub> ·10H <sub>2</sub> O, K <sub>2</sub> CO <sub>3</sub> and Na <sub>2</sub> CO <sub>3</sub> | F, Zn          | 1 wt% of CaF <sub>2</sub> and 1 wt% of ZnO enables the coexistence of alite and ye'elimite; higher 1-day compressive strength                                                                                                                                                        |
|      |                                                              |                                           |                                                                                                                                                                                                                                                                                                                  | F, Zn, B, Na   | 0.6 wt% of B <sub>2</sub> O <sub>3</sub> and 0.3 wt% of Na <sub>2</sub> O enables stabilization of α'H polymorph of belite; additional borax has not contributed to stabilization; much higher 28-days compressive strength; Zn and F are mainly incorporated into ferrite and alite |
| [5]  | commercial CSA clinker + 20% gypsum                          | Immobilization, hydration, microstructure | dissolution of 0.5 mol/L of ZnCl <sub>2</sub> in mixing water                                                                                                                                                                                                                                                    | Zn             | No detection of Zn in the leachate; at early age (<1 day) Zn immobilized by the precipitation of an unknown phase (possibly LDH); at later age, the most probable mechanism was sorption of Zn <sup>2+</sup> onto aluminum hydroxide                                                 |
| [6]  | synthetic BYF clinker + anhydrite (95:5 mass ratio)          | clinker mineralogy, cement hydration, and | B, Na, and Ba added to the clinker raw meal as H <sub>3</sub> BO <sub>3</sub> , Na <sub>2</sub> CO <sub>3</sub> ,                                                                                                                                                                                                | B              | stabilization α'H polymorph of belite; increase in proportion of cubic ye'elimite; increase in cumulative heat                                                                                                                                                                       |
|      |                                                              |                                           |                                                                                                                                                                                                                                                                                                                  | B/Na           | stabilization α'H polymorph of belite; increase in proportion of cubic ye'elimite; incorporation of Na into belite and ye'elimite; decrease in cumulative heat at 3 days; decrease in degree of hydration of ye'elimite                                                              |

|     |                                                                                                     |                                               |                                                                                                                                                                                                                                                                                                                                                                                                                                                                                                                                                                                                                                           |                                                 |                                                                                                                                                                                                                                                                                       |
|-----|-----------------------------------------------------------------------------------------------------|-----------------------------------------------|-------------------------------------------------------------------------------------------------------------------------------------------------------------------------------------------------------------------------------------------------------------------------------------------------------------------------------------------------------------------------------------------------------------------------------------------------------------------------------------------------------------------------------------------------------------------------------------------------------------------------------------------|-------------------------------------------------|---------------------------------------------------------------------------------------------------------------------------------------------------------------------------------------------------------------------------------------------------------------------------------------|
|     |                                                                                                     | compressive strength                          | and BaCO <sub>3</sub> (0.06-0.2mol/mol belite)                                                                                                                                                                                                                                                                                                                                                                                                                                                                                                                                                                                            | B/Ba                                            | stabilization $\alpha'$ H polymorph of belite; increase in proportion of cubic ye'elimite; incorporation of Ba into belite and ye'elimite; increase in cumulative heat at 3 days; increase in degree of hydration of ye'elimite; formation of barite circles around clinker particles |
| [7] | mixture of synthetic ye'elimite, gypsum, and lime in stoichiometric ratios for ettringite formation | Immobilization, crystal morphology            | dissolution of 10%(of binder) metal salts<br>Cd(NO <sub>3</sub> ) <sub>2</sub> ,<br>Cr(NO <sub>3</sub> ) <sub>3</sub> ,<br>Cu(NO <sub>3</sub> ) <sub>2</sub> ,<br>Fe(NO <sub>3</sub> ) <sub>3</sub> ,<br>Mn(NO <sub>3</sub> ) <sub>3</sub> ,<br>Ni(NO <sub>3</sub> ) <sub>2</sub> ,<br>Pb(NO <sub>3</sub> ) <sub>2</sub> ,<br>Zn(NO <sub>3</sub> ) <sub>2</sub> , K <sub>2</sub> CrO <sub>4</sub> and K <sub>2</sub> MoO <sub>4</sub> in mixing water                                                                                                                                                                                     | Cd                                              | excellent stabilization in water and pH 4 HNO <sub>3</sub> ; >80% metal release in pH 4.74 acetic acid/sodium acetate buffer                                                                                                                                                          |
|     |                                                                                                     |                                               |                                                                                                                                                                                                                                                                                                                                                                                                                                                                                                                                                                                                                                           | Cr <sup>3+</sup>                                | excellent stabilization in water and pH 4 HNO <sub>3</sub> ; >35% metal release in pH 4.74 acetic acid/sodium acetate buffer                                                                                                                                                          |
|     |                                                                                                     |                                               |                                                                                                                                                                                                                                                                                                                                                                                                                                                                                                                                                                                                                                           | Cu                                              | excellent stabilization in water and pH 4 HNO <sub>3</sub> ; >35% metal release in pH 4.74 acetic acid/sodium acetate buffer                                                                                                                                                          |
|     |                                                                                                     |                                               |                                                                                                                                                                                                                                                                                                                                                                                                                                                                                                                                                                                                                                           | Fe <sup>3+</sup>                                | excellent stabilization in water and pH 4 HNO <sub>3</sub> ; >35% metal release, lower integrity loss, and needle-like ettringite microcrystals in pH 4.74 acetic acid/sodium acetate buffer                                                                                          |
|     |                                                                                                     |                                               |                                                                                                                                                                                                                                                                                                                                                                                                                                                                                                                                                                                                                                           | Mn                                              | excellent stabilization in water and pH 4 HNO <sub>3</sub> ; <10% metal release in pH 4.74 acetic acid/sodium acetate buffer                                                                                                                                                          |
|     |                                                                                                     |                                               |                                                                                                                                                                                                                                                                                                                                                                                                                                                                                                                                                                                                                                           | Ni                                              | excellent stabilization in water and pH 4 HNO <sub>3</sub> ; >10% metal release in pH 4.74 acetic acid/sodium acetate buffer                                                                                                                                                          |
|     |                                                                                                     |                                               |                                                                                                                                                                                                                                                                                                                                                                                                                                                                                                                                                                                                                                           | Pb                                              | Loss of physical integrity and higher leached quantities in water and pH 4 HNO <sub>3</sub> ; >10% metal release, high integrity loss and no well-defined microcrystals in pH 4.74 acetic acid/sodium acetate buffer                                                                  |
|     |                                                                                                     |                                               |                                                                                                                                                                                                                                                                                                                                                                                                                                                                                                                                                                                                                                           | Zn                                              | excellent stabilization in water and pH 4 HNO <sub>3</sub> ; >35% metal release, lower integrity loss and needle-like ettringite microcrystals in pH 4.74 acetic acid/sodium acetate buffer                                                                                           |
|     |                                                                                                     |                                               |                                                                                                                                                                                                                                                                                                                                                                                                                                                                                                                                                                                                                                           | (CrO <sub>4</sub> ) <sup>2-</sup>               | Loss of physical integrity and higher leached quantities in water and pH 4 HNO <sub>3</sub> ; >10% metal release in pH 4.74 acetic acid/sodium acetate buffer                                                                                                                         |
|     |                                                                                                     |                                               |                                                                                                                                                                                                                                                                                                                                                                                                                                                                                                                                                                                                                                           | (MoO <sub>4</sub> ) <sup>2-</sup>               | Loss of physical integrity and higher leached quantities in water and pH 4 HNO <sub>3</sub> ; >10% metal release, high integrity loss and no well-defined microcrystals in pH 4.74 acetic acid/sodium acetate buffer                                                                  |
| [8] | CSA clinker + 20 or 30% phosphogypsum                                                               | Immobilization, hydration, crystal morphology | dissolution of metal salts<br>Na <sub>2</sub> CrO <sub>4</sub> I <sub>4</sub> H <sub>2</sub> O((CrO <sub>4</sub> ) <sup>2-</sup> );<br>Na <sub>2</sub> Cr <sub>2</sub> O <sub>7</sub> I <sub>2</sub> H <sub>2</sub> O((Cr <sub>2</sub> O <sub>7</sub> ) <sup>2-</sup> );<br>CrCl <sub>3</sub> I <sub>6</sub> H <sub>2</sub> O(Cr <sup>3+</sup> );<br>Pb(NO <sub>3</sub> ) <sub>2</sub> ;<br>Zn(NO <sub>3</sub> ) <sub>2</sub> I <sub>6</sub> H <sub>2</sub> O;<br>ZnSO <sub>4</sub> I <sub>7</sub> H <sub>2</sub> O; and<br>CdCl <sub>2</sub> I <sub>5</sub> H <sub>2</sub> O in mixing water at a concentration of 0.069mol/kg of binder | (CrO <sub>4</sub> ) <sup>2-</sup>               | Loss of physical integrity; higher percent of macropores; apparent delay in ettringite precipitation (conductivity and solution analysis); much higher leached quantities, especially at 30% gypsum; numerous short hexagonal crystals of ettringite                                  |
|     |                                                                                                     |                                               |                                                                                                                                                                                                                                                                                                                                                                                                                                                                                                                                                                                                                                           | (Cr <sub>2</sub> O <sub>7</sub> ) <sup>2-</sup> | Loss of physical integrity; higher percent of macropores; apparent delay in ettringite precipitation (solution analysis); higher leached quantities, especially at 30% gypsum; numerous short hexagonal crystals of ettringite                                                        |
|     |                                                                                                     |                                               |                                                                                                                                                                                                                                                                                                                                                                                                                                                                                                                                                                                                                                           | Cr <sup>3+</sup>                                | acceleration in ettringite precipitation (solution analysis), excellent stabilization regardless of gypsum %; hollow and more elongated ettringite crystals                                                                                                                           |
|     |                                                                                                     |                                               |                                                                                                                                                                                                                                                                                                                                                                                                                                                                                                                                                                                                                                           | Pb                                              | excellent stabilization regardless of gypsum %                                                                                                                                                                                                                                        |
|     |                                                                                                     |                                               |                                                                                                                                                                                                                                                                                                                                                                                                                                                                                                                                                                                                                                           | Zn                                              | excellent stabilization regardless of gypsum %                                                                                                                                                                                                                                        |
|     |                                                                                                     |                                               |                                                                                                                                                                                                                                                                                                                                                                                                                                                                                                                                                                                                                                           | Cd                                              | excellent stabilization regardless of gypsum %                                                                                                                                                                                                                                        |
| [9] | Commercial CSA clinker and CSA cement                                                               | Hydration                                     | 0.5M of B added as boric acid in mixing water + NaOH to reach pH 7                                                                                                                                                                                                                                                                                                                                                                                                                                                                                                                                                                        | B                                               | No crystalline products observed up to 28 days; no heat released for 72h. Dense amorphous layer of ulexite covering CSA clinker particles retards hydration; crystalline ulexite detected at 56 days.                                                                                 |

|      |                                                                                          |                       |                                                                                                                                                                                                                                                                                                                                                                                                                  |                                   |                                                                                                                                                                                                                                                                                                                                                                                                                                                                                          |
|------|------------------------------------------------------------------------------------------|-----------------------|------------------------------------------------------------------------------------------------------------------------------------------------------------------------------------------------------------------------------------------------------------------------------------------------------------------------------------------------------------------------------------------------------------------|-----------------------------------|------------------------------------------------------------------------------------------------------------------------------------------------------------------------------------------------------------------------------------------------------------------------------------------------------------------------------------------------------------------------------------------------------------------------------------------------------------------------------------------|
| [10] | ye'elimite phase (purity was not reported) with and without SrSO <sub>4</sub> and gypsum | Hydration             | SR and Ba added as SrSO <sub>4</sub> or BaSO <sub>4</sub> in stoichiometric molar ratios to form C <sub>3</sub> A <sub>3</sub> SrSO <sub>4</sub> and C <sub>3</sub> A <sub>3</sub> BaSO <sub>4</sub>                                                                                                                                                                                                             | Sr                                | Hydration of Sr-doped ye'elimite + gypsum produced ettringite and AH <sub>3</sub> ; SrSO <sub>4</sub> detected; poorly connected microstructure; lath-like ettringite; gypsum lowers compressive strength. Hydration of Sr-doped ye'elimite + SrSO <sub>4</sub> produced Afm, AH <sub>3</sub> , CAH <sub>10</sub> and less ettringite; more SrSO <sub>4</sub> detected; denser microstructure; SrSO <sub>4</sub> higher compressive strength, but strength loss at 90 days.              |
|      |                                                                                          |                       |                                                                                                                                                                                                                                                                                                                                                                                                                  | Ba                                | Reaction delayed by gypsum. Hydration of Ba-doped ye'elimite + gypsum produced ettringite, monosulfate and AH <sub>3</sub> ; BaSO <sub>4</sub> detected; poorly connected microstructure; lath-like ettringite; gypsum lowers compressive strength.                                                                                                                                                                                                                                      |
| [11] | Pure C4AF clinker                                                                        | Hydration, Mineralogy | Samples were prepared with dosages of 0.02, 0.1, 0.5, 2.5, and 5.0 wt.% of Cr, Ni, and Zn (in form of their oxides) in mixing water                                                                                                                                                                                                                                                                              | Cr                                | In the sample with Cr, absolutely no C <sub>3</sub> AH <sub>6</sub> could be detected by XRD, but a small amount of C <sub>2</sub> AH <sub>8</sub> was found; the compound Ca <sub>4</sub> Al <sub>6</sub> O <sub>12</sub> CrO <sub>4</sub> was still unchanged; after 28 days only the hydration of the sample with Cr remained incomplete and much C <sub>4</sub> AH <sub>13</sub> and C <sub>2</sub> AH <sub>8</sub> was found; Cr delays and decreases substantially heat liberation |
|      |                                                                                          |                       |                                                                                                                                                                                                                                                                                                                                                                                                                  | Ni                                | After one day, the rate of hydration of the sample from pure C4AF and the sample with Ni were identical; compared to pure C4AF, Ni gives a higher rate of maximum heat liberation                                                                                                                                                                                                                                                                                                        |
|      |                                                                                          |                       |                                                                                                                                                                                                                                                                                                                                                                                                                  | Zn                                | the rate of hydration of the sample with Zn was about 70% that of pure C4AF; the effect of Zn on the heat liberation is very small                                                                                                                                                                                                                                                                                                                                                       |
| [12] | Synthesized C <sub>3</sub> S and C <sub>4</sub> A <sub>3</sub> S                         | Mineralogy            | Addition of CuO into raw meal. Weight % used were 0.1, 0.3, 0.5, 1                                                                                                                                                                                                                                                                                                                                               | Cu                                | Cu can lower the formation temperature of C <sub>4</sub> A <sub>3</sub> S by about 50 °C; coexistence with C <sub>3</sub> S is facilitated; when the addition of CuO reaches 1.0%, the amount of C <sub>4</sub> A <sub>3</sub> S decomposes                                                                                                                                                                                                                                              |
| [13] | Industrial CSA clinker pure and +10, 20 or 35% gypsum                                    | Hydration, Mineralogy | The mixing solution was prepared by dissolving the appropriate amount of analytical grade salt (ZnCl <sub>2</sub> 0, 0.01 or 0.5 mol/L, ZnSO <sub>4</sub> ·7H <sub>2</sub> O 0 or 0.5 mol/L, Zn(NO <sub>3</sub> ) <sub>2</sub> ·6H <sub>2</sub> O 0 or 0.5 mol/L, CaCl <sub>2</sub> ·2H <sub>2</sub> O 0 or 0.5 mol/L, Ca(NO <sub>3</sub> ) <sub>2</sub> ·4H <sub>2</sub> O 0 or 0.5 mol/L) into distilled water | ZnCl <sub>2</sub>                 | This salt tended to retard the hydration process, especially when the binder did not contain any gypsum; when the gypsum content reached 20%, the retardation was only noticeable for a 0.5 mol/L ZnCl <sub>2</sub> concentration; the strong accelerating effect of gypsum was predominant and mortars were only slightly retarded; with 20% gypsum zinc was efficiently insolubilized; the most probable mechanism would be an incorporation of Zn in the interlayer of C–S–H          |
|      |                                                                                          |                       |                                                                                                                                                                                                                                                                                                                                                                                                                  | ZnSO <sub>4</sub>                 | Mortars prepared with a gypsum-free cement hydrated more rapidly when the mixing solution contained zinc cations instead of calcium cations                                                                                                                                                                                                                                                                                                                                              |
|      |                                                                                          |                       |                                                                                                                                                                                                                                                                                                                                                                                                                  | Zn(NO <sub>3</sub> ) <sub>2</sub> | Mortars prepared with a gypsum-free cement hydrated more rapidly when the mixing solution contained zinc cations instead of calcium cations                                                                                                                                                                                                                                                                                                                                              |
|      |                                                                                          |                       |                                                                                                                                                                                                                                                                                                                                                                                                                  | CaCl <sub>2</sub>                 | Retarding effect; rapid precipitation of Friedel's salt, at the expense of ettringite and other AFm phases during the retardation period; the strong accelerating effect of gypsum was predominant and mortars were only slightly retarded                                                                                                                                                                                                                                               |
|      |                                                                                          |                       |                                                                                                                                                                                                                                                                                                                                                                                                                  | CaSO <sub>4</sub>                 | Sample without gypsum: accelerates hydration                                                                                                                                                                                                                                                                                                                                                                                                                                             |
|      |                                                                                          |                       |                                                                                                                                                                                                                                                                                                                                                                                                                  | Ca(NO <sub>3</sub> ) <sub>2</sub> | Sample without gypsum: retards hydration but not as much as CaCl <sub>2</sub>                                                                                                                                                                                                                                                                                                                                                                                                            |
|      |                                                                                          |                       |                                                                                                                                                                                                                                                                                                                                                                                                                  | Cr <sup>3+</sup>                  | Especially in the case of chromium, AFt or AFm phases appeared in both samples from day 1; 5,000 ppm and 1,000 ppm Cr accelerated the hydration; 10,000 ppm Cr retarded                                                                                                                                                                                                                                                                                                                  |

|      |                                             |                                                                    |                                                                                                                                                                                                                                                                                                                                                                                                |                  |                                                                                                                                                                                                                                                                                                                                                                                                                                                                                                                                                                                                                                                                                                                                       |
|------|---------------------------------------------|--------------------------------------------------------------------|------------------------------------------------------------------------------------------------------------------------------------------------------------------------------------------------------------------------------------------------------------------------------------------------------------------------------------------------------------------------------------------------|------------------|---------------------------------------------------------------------------------------------------------------------------------------------------------------------------------------------------------------------------------------------------------------------------------------------------------------------------------------------------------------------------------------------------------------------------------------------------------------------------------------------------------------------------------------------------------------------------------------------------------------------------------------------------------------------------------------------------------------------------------------|
| [14] | Industrial CSA clinker alone or +20% gypsum | Hydration                                                          | Mixing solution was either demineralized water or a solution containing 1 mol/L of borate ions at pH 11                                                                                                                                                                                                                                                                                        | B/Na             | Borate ions retarded CSA cement hydration, mainly when gypsum content of the binder was high.; rapidly partially depleted from the mixing solution and precipitated into two hydrates: ulexite and a mixed AFt-type phase; duration of the period of low thermal activity increased with the amount of ulexite precipitated, acceleration of cement hydration occurred only when this phase was destabilized and began to dissolve; preventing, or limiting, the precipitation of ulexite was found to be an efficient way to decrease the retardation of CSA cement hydration due to borate ions. This could be achieved by decreasing the gypsum content of the cement, or by increasing the sodium content of the mixing solution. |
| [15] | Industrial CSA clinker alone or +10% gypsum | Hydration                                                          | Water-to-cement (w/c) ratio of 0.6 and mixed with several solutions of lithium hydroxide (0 to 0.1 mmol Li/g of cement)                                                                                                                                                                                                                                                                        | Li               | Acceleration of CSA hydration at 25 °C did not vary linearly with its concentration in solution; increased strongly for small additions (Li/C ratio from 0 to 0.03 mmol/g and leveled off for higher additions; the fast initial precipitation of Li-containing Al(OH)3 consumed aluminate ions from the solution, which in turn promoted the dissolution of ye'elimite and mayenite                                                                                                                                                                                                                                                                                                                                                  |
| [16] | Industrial CSA clinker                      | Immobilization, Setting time, Compressive strength, Microstructure | Soluble salts (Cr(NO <sub>3</sub> ) <sub>3</sub> · 9H <sub>2</sub> O, Pb(NO <sub>3</sub> ) <sub>2</sub> , Cd(NO <sub>3</sub> ) <sub>2</sub> · 4H <sub>2</sub> O) were dissolved in deionized water to prepare solutions with concentrations of 2 g/L, 4 g/L, 6 g/L, 8 g/L, and 10 g/L                                                                                                          | Cr <sup>3+</sup> | As the concentrations of added Cr <sup>3+</sup> increased, the leaching concentrations of Cr <sup>3+</sup> in CSA increased; retarded the setting time of CSA slightly; setting time was gradually extended with the increase of initial concentration; compressive strength changed by only a small amount; promoted the longitudinal growth of ettringite.                                                                                                                                                                                                                                                                                                                                                                          |
|      |                                             |                                                                    |                                                                                                                                                                                                                                                                                                                                                                                                | Pb               | Leaching concentrations were less than 5 mg/L; small effects on the setting time of CSA pastes; initial and final setting time were shortened by less than 5 min with the increase in Pb <sup>2+</sup> initial concentrations; compressive strength of was slightly higher than that without Pb <sup>2+</sup> ; ettringite crystals became a short sheet and the longitudinal length of the crystals was shortened                                                                                                                                                                                                                                                                                                                    |
|      |                                             |                                                                    |                                                                                                                                                                                                                                                                                                                                                                                                | Cd               | Very good immobilization; clear retardation effect; when the concentrations of added Cd <sup>2+</sup> increased from 0 to 10 g/L, the setting times of CSA pastes were continuously prolonged; compressive strength increased when the concentration of added Cd <sup>2+</sup> was 2 g/L; compressive strength decreased slightly by increasing concentrations of added Cd <sup>2+</sup> ; ettringite grew to a shape of flake with a high length and the number of crystals increased significantly                                                                                                                                                                                                                                  |
| [17] | Synthesized C4A3\$ clinker                  |                                                                    | Samples of ye'elimite corresponding to the formula Ca <sub>4</sub> (Al <sub>1-x</sub> Fe <sub>x</sub> ) <sub>6</sub> SO <sub>16</sub> (with x = 0.00, 0.02, 0.05, 0.07, 0.1, 0.12, 0.15, and 0.25) were synthesized from stoichiometric amounts of analytical reagent grade CaCO <sub>3</sub> , Al(OH) <sub>3</sub> , CaSO <sub>4</sub> ·2H <sub>2</sub> O, and Fe <sub>2</sub> O <sub>3</sub> | Fe <sup>3+</sup> | Substitution of the Fe <sup>3+</sup> ions into ye'elimite improved the stability of the cubic phase at room temperature; facilitated the transformation process from orthorhombic to cubic; early hydration kinetics were faster for the Fe <sup>3+</sup> -doped ye'elimite; after 30 hours of hydration, the values of the cumulative heat of the Fe <sup>3+</sup> -doped ye'elimite phase were almost the same as pure ye'elimite                                                                                                                                                                                                                                                                                                   |

|      |                                 |                                               |                                                                                                                                                                                         |                                 |                                                                                                                                                                                                                                                                                                                                              |
|------|---------------------------------|-----------------------------------------------|-----------------------------------------------------------------------------------------------------------------------------------------------------------------------------------------|---------------------------------|----------------------------------------------------------------------------------------------------------------------------------------------------------------------------------------------------------------------------------------------------------------------------------------------------------------------------------------------|
| [18] | Synthesized CSA clinker         | Hydration, Compressive strength               | Zinc was introduced into the raw meal as ZnO to produce doped clinkers. The amount of ZnO added was 0.1, 0.3, 0.5, 1 or 2 wt%                                                           | Zn                              | Threshold limit for zinc was found to be 0.3 wt% regardless of the CSA clinker composition; no major effect on cement hydration was observed; after 7 days of curing, the compressive strength of the cement paste doped with zinc was equivalent to that of the reference                                                                   |
| [19] | Industrial CSA clinker          | Hydration, Microstructure                     | Mixed with three different kinds of lithium compounds, Li <sub>2</sub> CO <sub>3</sub> , LiCl and Li <sub>2</sub> SO <sub>4</sub> . Amounts used were 0, 0.2%, 0.4%, 0.6% and 0.8 wt. % | Li <sub>2</sub> CO <sub>3</sub> | Could significantly accelerate the hydration process; improved the precipitation of CaCO <sub>3</sub> for denser microstructure                                                                                                                                                                                                              |
|      |                                 |                                               |                                                                                                                                                                                         | LiCl                            | Could significantly accelerate the hydration process; might accelerate the hydration process by facilitating the transformation of AFm phase into Friedel's salt and swapping out SO <sub>4</sub> <sup>2-</sup> required for the AFt formation; might cause corrosion of steel bars                                                          |
|      |                                 |                                               |                                                                                                                                                                                         | Li <sub>2</sub> SO <sub>4</sub> | Could significantly accelerate the hydration process; might increase the content of active calcium sulfate, which further reacted with AH <sub>3</sub> and CH produced by hydration to promote the growth of AFt; could promote the early strength                                                                                           |
| [20] | Synthesized C4A3\$              | Hydration, Mineralogy, Microstructure         | BaCO <sub>3</sub> was added to the raw meal to obtain C3.5B0.5A3\$ and C3BA3\$                                                                                                          | Ba/Ca                           | Reacts faster than the stoichiometric ye'elimite; releases less heat than the stoichiometric ye'elimite; hydration sequences and main products vary significantly with different Ba/Ca ratios; AFt is absent for the system with barium incorporation in the selected curing ages and AFm tends to be less with the increase of Ba/Ca ratio  |
| [21] | 75% CSA clinker + phosphogypsum | Hydration, Setting time, Compressive strength | Different combinations of phosphogypsum with high and low s-P <sub>2</sub> O <sub>5</sub> content were added to the CSA clinker                                                         | P                               | The s-P <sub>2</sub> O <sub>5</sub> and heavy metals in PG could be effectively immobilized; lowers down the driving force for the precipitation of ettringite; dissolution and hydration of C4A3\$ is also inhibited; prolongs the setting time; lowers down the early age compressive strength and leads to a higher linear expansion rate |

**Table S-2.** Experimental studies on the use of tailings of different origins as a partial replacement for cement.

| Reference                            | Tailings type                                                           | SO <sub>3</sub> content (%) | Major minerals                                                                                    | Activation method                                          | Observations                                                                                                                                                                                                                                                                                                                                                                 |
|--------------------------------------|-------------------------------------------------------------------------|-----------------------------|---------------------------------------------------------------------------------------------------|------------------------------------------------------------|------------------------------------------------------------------------------------------------------------------------------------------------------------------------------------------------------------------------------------------------------------------------------------------------------------------------------------------------------------------------------|
| Choi <i>et al.</i> , 2009 [22]       | tungsten tailings                                                       | <1.5                        | quartz, chlorite, anorthite, cordierite                                                           | unactivated                                                | loss of flowability and compressive strength with increase in replacement ratio; SCM reaction from tailings was not identified                                                                                                                                                                                                                                               |
| Peng <i>et al.</i> , 2015 [23]       | tungsten tailings                                                       | <0.2                        | garnet, amphibole, chlorite                                                                       | grinding and 20% activator (lime, gypsum, sodium silicate) | Grinding and lime activation improve compressive strength; no direct evidence of activation mechanisms                                                                                                                                                                                                                                                                       |
| Guo <i>et al.</i> , 2016 [24]        | pyrite tailings                                                         | 5.41                        | kaolinite, anatase, calcite, pyrite                                                               | calcination at 700-900°C and grinding                      | Calcined and ground tailings showed high pozzolanic activity; all replacement ratios (5-40%) contributed to improvement in strength; optimum replacement ratio is 20% wt.; optimum fineness is d <sub>90</sub> =12µm; workability of concrete was impaired with increasing tailings %                                                                                        |
| Vargas and Lopez, 2018 [25]          | 08 different copper tailings (from ongoing operation and long-standing) | <2.6                        | quartz, albite, zinc oxide, cristobalite, kaolinite, montmorillonite, dolomite, calcite, feldspar | calcination at 600-800°C and grinding                      | Varied chemical composition and physical properties affect performance in different ways; case-by-case analysis is required to determine reactive potential. The effect of thermal treatment is more significant at later ages, while effect of grinding is more significant at early ages. Decomposition of clay minerals increased pozzolanic activity of treated tailings |
| Simonsen <i>et al.</i> , 2020 [26]   | 13 different tailings from metal and industrial mineral mines           | <3.25                       |                                                                                                   | unactivated                                                | All tailings studied have significantly different properties. Reactive potential for low strength application screened by chemical composition, mineralogy, and physical properties                                                                                                                                                                                          |
| Magalhaes <i>et al.</i> , 2020 [27]  | iron ore tailings                                                       | -                           | quartz, hematite, goethite, kaolinite                                                             | calcination at 500-750°C                                   | Decomposition of kaolinite due to calcination was not sufficient to improve compressive strength (0-30% replacement level); strong colour differences due to conversion of goethite to hematite                                                                                                                                                                              |
| Ramanathan <i>et al.</i> , 2021 [28] | Ni-Cu tailings                                                          | 0.3                         | tremolite, clinocllore, siderophyllite                                                            | grinding                                                   | Disc-milled tailings showed reduction in d <sub>50</sub> and increase in amorphous content. Higher heat release, although still in the inert material zone, was observed in a modified R3 test, and slight portlandite consumption in cement pastes when replacing 30% of PC                                                                                                 |

**Table S-3.** Alkali activated co-binders produced from mine tailings with other side streams.

| Reference             | Type of MTs                 | Co-binder                                             | S content in MTs | Pre-treatment | Alkali activator                                            | Aggregates | Curing conditions              | Observations                                                                                                                                                                                                                                                                                                                                |
|-----------------------|-----------------------------|-------------------------------------------------------|------------------|---------------|-------------------------------------------------------------|------------|--------------------------------|---------------------------------------------------------------------------------------------------------------------------------------------------------------------------------------------------------------------------------------------------------------------------------------------------------------------------------------------|
| Zhang et al. [29]     | Copper mine tailings        | Fly ash (FA) (0-100%)                                 | 1.66%            | n.a.          | Sodium hydroxide solution (5, 10, 15M)                      | n.a.       | 60 °C                          | Si/Al, NaOH concentration, and curing time considerably affect geopolymerization of the co-binder. The compressive strength can be controlled by adjusting the content of fly ash, varying from 1.37 MPa to 21.2 MPa.                                                                                                                       |
| Ahmari et al. [30]    | Copper mine tailings        | Cement kiln duct (CKD) (0-10%)                        | 1.66%            | n.a.          | Sodium hydroxide solution (10, 15M)                         | n.a.       | 90 °C, forming pressure        | CKD can significant improve the physical and chemical properties of geopolymer bricks, which meets the lowest standard limit of ASTM. CKD can promote the geopolymerization of co-binders. CaCO <sub>3</sub> formed, and it coexists with geopolymeric gels.                                                                                |
| Falayi et al. [31]    | Gold mine tailings          | FA and blast oxygen furnace slag (BOF) (0-50%)        | 3.05%            | n.a.          | Potassium hydroxide solution (5, 10, 15M)                   | n.a.       | Ambient condition and 50-90 °C | FA and BOF slag can modify mine tailings based geopolymers, where slag-MT geopolymers requires a lower curing temperature than that of FA-MT based mine tailings. Elevated curing temperature can enhance the performance of co-binders. Both FA and BOF modified MT-geopolymers meet the acceptable limits for static leaching tests.      |
| Duan et al. [32]      | Iron ore mine tailings      | FA (30%)                                              | n.a.             | n.a.          | 10M sodium hydroxide and sodium silicate solution           | n.a.       | Ambient condition              | Porous FA-MT based geopolymer was synthesized with high total porosity of 74.6%. It achieves 90.7% removal efficiency. The initial Cu <sup>2+</sup> concentration, pH, contact time, and temperature are main factors.                                                                                                                      |
| Kiventerä et al. [33] | Gold mine tailings          | ground granulated blast furnace slag (GGBFS) (0-100%) | 5.2%             | n.a.          | Sodium hydroxide (5, 10, 15M)                               | n.a.       | Ambient condition              | Pristine MT based geopolymer can reach a compressive strength of 3.5 MPa. 5% additive of GGBFS can increase the compressive from 1.3 MPa to 4.4 MPa with 5M NaOH solution. 25% GGBFS modified MT geopolymer achieves a 25 MPa at 28 days compressive strength with 5M NaOH solution. Leaching test is required in the future investigation. |
| Kiventerä et al. [34] | Gold mine tailings (40-50%) | GGBFS (20-30%) + metakaolin (MK) (30%)                | 5.2%             | n.a.          | Sodium hydroxide solution (8, 9M), sodium silicate solution | n.a.       | Ambient condition              | A high immobilization efficiency was achieved for main elements such as (Cr, Cu, Ni, Zn, and Mn). A better performance can be seen for a longer curing at 28 days. The problematic oxyanions such as (As, Sb, B, and V) can be highly immobilized after 7 and 28 days curing in terms of pristine mine tailings.                            |

|                       |                           |                          |       |                                                                             |                                                                                       |      |                                                      |                                                                                                                                                                                                                                                                                                                                                                                                                                                            |
|-----------------------|---------------------------|--------------------------|-------|-----------------------------------------------------------------------------|---------------------------------------------------------------------------------------|------|------------------------------------------------------|------------------------------------------------------------------------------------------------------------------------------------------------------------------------------------------------------------------------------------------------------------------------------------------------------------------------------------------------------------------------------------------------------------------------------------------------------------|
| Kiventerä et al. [35] | Gold mine tailings        | GGBFS (10-25%)           | 3.9%  | Vibratory disc mill 2 min at 1000 rpm; thermal treatment at 900 °C for 6 h. | Sodium hydroxide solution, sodium silicate solution, 5 % Ca(OH) <sub>2</sub> solution | n.a. | Room temperature with RH 90%                         | Sulfates and arsenic can be efficiently stabilized in the co-binders after 7-days curing. Thermal treatment can increase reactivity of mine tailings; however, there is no significant influence on heavy metal stabilization. The formation of Ca(AsO) <sub>2</sub> was found due to the additive of Ca(OH) <sub>2</sub> .                                                                                                                                |
| Jiang et al. [36]     | Gold mine tailings        | OPC+ slag                | 0.45% | n.a.                                                                        | Sodium hydroxide and sodium silicate                                                  | n.a. | RH 95±1% for 24h, followed by 30 and 40 °C, RH 80±2% | Decreased workability and increased compressive can be seen with more solid content. 8% of binder dosage gives a favorable 3-day compressive strength of 1.34 MPa. The highest compressive achieved at an alkali activator/binder at 0.3. Sodium silicate/sodium hydroxide slightly effects workability, while compressive strength is largely depending on the curing time. Elevated curing temperature improves the performance of compressive strength. |
| Cihangir et al. [37]  | Copper-zinc mine tailings | OPC + blast furnace slag | 40.7% | n.a.                                                                        | Sodium hydroxide and sodium silicate                                                  | n.a. | RH 85±1% , room temperature 20±1 °C                  | The introduce of slag can improve the mechanical strength and stability performance due to the high pH (≥ 10.7). A lower content of Ca results in less formation of gypsum. The alkali activator type and curing time have major effects on physical and chemical properties of co-binders.                                                                                                                                                                |
| Manjarrez et al. [38] | Copper mine tailings      | Low Ca slag (0-50%)      | n.a.  | n.a.                                                                        | Sodium hydroxide solution (5, 10, 15M) + sodium silicate                              | n.a. | 45 °C, 53 °C, 60 °C, 68 °C, and 75 °C, respectively  | The optimal w/s ratio of 0.158 can be seen for co-binders. Slag can improve the mechanical performance of co-binder, while the ratio of sodium silicate and sodium hydroxide matters. A higher sodium hydroxide concentration of 15M significantly decreases workability. The behavior of Fe should be considered during geopolymerization.                                                                                                                |
| Ahmari et al. [39]    | Copper mine tailings      | Smelt slag (0-100%)      | 1.66% | n.a.                                                                        | Sodium hydroxide                                                                      | n.a. | 60, 75, 90, and 105 °C, forming pressure 0.5-3 MPa   | Low calcium smelter slag modified mine tailings geopolymers possess higher mechanical performance. A higher content of slag requires a lower curing temperature. The co-binder has a fast setting time, and the major compressive strength obtained after only 7 days.                                                                                                                                                                                     |

|                      |                                         |                                   |        |                                  |                                         |      |                                                  |                                                                                                                                                                                                                                                                                                                                                                                                                               |
|----------------------|-----------------------------------------|-----------------------------------|--------|----------------------------------|-----------------------------------------|------|--------------------------------------------------|-------------------------------------------------------------------------------------------------------------------------------------------------------------------------------------------------------------------------------------------------------------------------------------------------------------------------------------------------------------------------------------------------------------------------------|
| Wu et al. [40]       | Copper mine tailings                    | Metakaolin (40, 50, 60%)          | n.a.   | n.a.                             | Sodium silicate solution (6.17M)        | n.a. | 60 °C for 12h and room temperature until testing | Heating-cooling cycle promotes the formation of N-A-S-H gel. Si/Al significantly changes the backbone of N-A-S-H gel due to different components of metakaolin. The evolution of geopolymerization was evaluated for the purpose of marine concrete with tailings.                                                                                                                                                            |
| Wan et al. [41]      | Mine tailings from sphalerite flotation | Metakaolin (0-50%)                | 1.46%  | n.a.                             | Sodium silicate solution                | n.a. | 60 °C for 6h and room temperature until testing  | The highest compressive strength can be found at 17.3 MPa. When the additive of Pb(NO <sub>3</sub> ) <sub>2</sub> is less than 6%, a higher compressive can be seen due to the formation of lead silicate glass, whilst a lower compressive strength was obtained when the content of Pb(NO <sub>3</sub> ) <sub>2</sub> is higher than 6%. Co-binder generates geopolymeric gel which is able to efficiently immobilize lead. |
| Paiva et al. [42]    | Copper and zinc mine tailings           | BFS and metakaolin (0, 50, 62%)   | 26.18% | n.a.                             | Sodium hydroxide (10M)                  | n.a. | RH 65±5% , room temperature 20±5 °C              | Mine tailings are fine aggregates in this co-binder. The author concluded that MTs are quite inert and did not act as geopolymer precursor. Metakaolin based geopolymer obtains a good compressive strength of > 20 MPa. The geopolymerization was evaluated by rheology measurement. Geopolymers with high MTs content show good chemical resistance even after testing in a lower pH condition for 40 days.                 |
| Ren et al. [43]      | Copper mine tailings                    | Aluminum sludge (AG) (0, 10, 20%) | 2.22%  | n.a.                             | Sodium hydroxide                        | n.a. | 90 °C, 0.5 MPa forming pressure                  | By adding AG, there is clear enhancement seen in the final co-binders. A favorable compressive strength of 44.8 MPa was reached after optimizing recipe. AG can modify the Si/Al and accelerate the geopolymerization process.                                                                                                                                                                                                |
| Defăveri et al. [44] | Iron ore mine tailings (IOT)            | Glass wool residues (GWR)(0-30%)  | n.a.   | Grinding of IOT for 1, 2, and 3h | Sodium hydroxide (8, 10, 12M)           | n.a. | 100 °C                                           | The MTs based geopolymer shows promising compressive strength and flexural strength for 112.8 MPa and 21.3 MPa for 7 days, respectively. However, the additive of glass wool residues can decrease the mechanical performance of co-binders. Chamosite and chantalite participate in geopolymerization, while other minerals are inert. GWR facilitates the formation of C-S-H in geopolymers.                                |
| Kasiukas et al. [45] | Tungsten mine tailings                  | Waste glass (0-40%)               | 8.72%  | n.a.                             | Sodium hydroxide (10M), sodium silicate | n.a. | RH 50%, curing temperature 20-80 °C              | Blending with waste glass significantly increases the degree of amorphicity, which is superior to traditional calcination. A longer activator mixing time can reduce the dissolution of the precursor due to less initial alkali metals. The optimal condition was found as 80 °C for 24h.                                                                                                                                    |
| N.A.: not applicable |                                         |                                   |        |                                  |                                         |      |                                                  |                                                                                                                                                                                                                                                                                                                                                                                                                               |

**Table S-4.** Inorganic polymer (mortar) produced by solo mine tailings.

| Reference                  | Type of MTs            | SiO <sub>2</sub> content | Al <sub>2</sub> O <sub>3</sub> content | SO <sub>3</sub> content | Pre-treatment                                   | Alkali activator                                                  | Aggregates | Curing conditions                                                                      | Observations                                                                                                                                                                                                                                                                  |
|----------------------------|------------------------|--------------------------|----------------------------------------|-------------------------|-------------------------------------------------|-------------------------------------------------------------------|------------|----------------------------------------------------------------------------------------|-------------------------------------------------------------------------------------------------------------------------------------------------------------------------------------------------------------------------------------------------------------------------------|
| Aseniero et al. [46]       | Gold mine tailings     | 52.2% to 77.3%           | 4.48% to 9.71%                         | 1.13% to 2.31 %         | n.a.                                            | Lime sludge + 5M NaOH forming dry powder                          | n.a.       | Ambient condition                                                                      | A maximum compressive strength of 5.95 MPa. Aluminosilicate clays are playing vital role during geopolymerization. The system can be further developed by additive of other reactive components.                                                                              |
| Manjarrez et al. [47]      | Copper mine tailings   | 55.90%                   | 14.10%                                 | 2.22%                   | n.a.                                            | 3, 5, 7, and 11M NaOH solution                                    | n.a.       | 11, 14, 16, 17 and 19% moisture at 35 °C                                               | Both moisture content and concentration of NaOH have significant effect on the performance of resulted samples. The optimized product meets the strength requirement of cement-treated road base; however, it needs further leachate study before case application.           |
| Ahmari et al. [48]         | Copper mine tailings   | 64.8%                    | 7.08%                                  | 1.66%                   | n.a.                                            | 10 and 15M NaOH solution                                          | n.a.       | Curing temperature 60 to 120 °C, water content 8% to 18%, forming pressure 0 to 35 MPa | The highest compressive strength was achieved at 33.7 MPa. The specimens prepared at 15M NaOH express higher compressive strength than those at 10M. Forming pressure is essential without squeezed water out the mold. 90 °C is the optimal curing temperature in this work. |
| Pacheco-Torgal et al. [49] | Tungsten mine tailings | 53.48%                   | 16.66%                                 | 3.10%                   | Thermal treatment (650 to 950 °C) up to 480 min | 12M NaOH solution, sodium silicate solution and calcium hydroxide | Sand       | Ambient condition                                                                      | Tungsten mine tailing is a promising candidate for geopolymerization with lower carbon footprint. A bright perspective can be seen for tailing-based geopolymer mortar since its overall cost is similar or even under that of M9 geopolymeric fly ash-based concrete.        |

|                            |                        |        |        |        |                                                                     |                                                                       |                                     |                   |                                                                                                                                                                                                                                                                                                                                                                                                                      |
|----------------------------|------------------------|--------|--------|--------|---------------------------------------------------------------------|-----------------------------------------------------------------------|-------------------------------------|-------------------|----------------------------------------------------------------------------------------------------------------------------------------------------------------------------------------------------------------------------------------------------------------------------------------------------------------------------------------------------------------------------------------------------------------------|
| Pacheco-Torgal et al. [50] | Tungsten mine tailings | 53.48% | 16.66% | 3.10%  | Thermal treatment (950 °C, 2h )                                     | 24M NaOH solution, sodium silicate solution, calcium hydroxide powder | Schist sand, limestone, and granite | Ambient condition | The workability and setting time were not possible to assess the tailings-based binder due to the adhesion with device and paste-mortar difference. A lower water absorption was observed. The resulted mortar has aligned static elastic modulus compared with other researches. A long-term curing of the mortar with proper additive of superplasticizer leads to a higher compressive strength more than 80 MPa. |
| Pacheco-Torgal et al. [51] | Tungsten mine tailings | 53.48% | 16.66% | 3.10%  | Thermal treatment (950 °C, 2h )                                     | 24M NaOH solution, sodium silicate solution, calcium hydroxide powder | Coarse aggregates                   | Ambient condition | Tailings-based geopolymer binder shows a high bond strength with OPC concrete surface. The setting condition of geopolymer binder is superior to commercial products which requires proper curing conditions. Form the viewpoint of cost, the geopolymeric ones are the most efficient according to the research.                                                                                                    |
| Pacheco-Torgal et al. [52] | Tungsten mine tailings | 53.48% | 16.66% | 3.10%  | Thermal treatment (range from 450 to 1100 °C) with sodium carbonate | 12M NaOH solution, sodium silicate solution and calcium hydroxide     | Sand                                | Ambient condition | The additive of sodium carbonate leads to a lower early-stage compressive except optimal thermal pretreatment temperature. Sodium carbonate may cause unbalanced chemical combination and slat efflorescences after waster immersion compared with pristine mine tailings-based geopolymer mortar.                                                                                                                   |
| Falah et al. [53]          | Ni/Cu mine tailings    | 47.96% | 3.99%  | 0.15%  | Grinding of MT to a grain size lower than 5 µm                      | Sodium silicate solution                                              | n.a.                                | 40 and 60 °C      | Sodium silicate concentration, curing temperature/time have significant effect on the compressive and microstructure of final geopolymers. The optimal compressive strength can be achieved for the 28 days curing samples at 60 °C.                                                                                                                                                                                 |
| Koohestani et al. [54]     | Cu/Zn mine tailings    | 44.71% | 5.18%  | 37.65% | n.a.                                                                | Sodium silicate solution                                              | n.a.                                | Ambient condition | Sodium silicate concentration has significant effect on the curing behavior of tailings-based geopolymer. Increased pH can delay the hardening process. There is no geopolymeric gel observed at the pH                                                                                                                                                                                                              |

|                 |                   |        |        |      |                              |                |      |                                        |                                                                                                                                                                                                                                                  |
|-----------------|-------------------|--------|--------|------|------------------------------|----------------|------|----------------------------------------|--------------------------------------------------------------------------------------------------------------------------------------------------------------------------------------------------------------------------------------------------|
|                 |                   |        |        |      |                              |                |      |                                        | lower than 11. Only silica gel network contributes to the strength acquisition.                                                                                                                                                                  |
| Yao et al. [55] | Gold ore tailings | 72.86% | 13.68% | 0.16 | Planetary mill for 20-80 min | Anhydrite, CaO | n.a. | 20 °C with relative humidity above 95% | The final products reach a 28 days compressive strength of 4.12 MPa and an activity index of 78.99%. Mechanical activation is feasible to improve the pozzolanic reactivity, showing an effective approach to upscale mine tailings sustainably. |

N.A.: not applicable

**Table S-5.** Research studies on the production of building ceramics from mine tailings.

| Reference                       | Tailing material (wt%)     | Other mixed materials     | S/SO <sub>3</sub> tailing content (wt%)                    | Building ceramics application | Production conditions                                                                           | Main conclusions                                                                                                                                                                                                                                         |
|---------------------------------|----------------------------|---------------------------|------------------------------------------------------------|-------------------------------|-------------------------------------------------------------------------------------------------|----------------------------------------------------------------------------------------------------------------------------------------------------------------------------------------------------------------------------------------------------------|
| Abi et al., 2011 [56]           | Coal tailings (0-50)       | Primary clay              | SO <sub>3</sub> (0.22) from tailings:clay mix              | inner-wall bricks/blocks      | Fired 850-1050°C for 2 h                                                                        | Up to 15 wt% tailings integration gave satisfying mechanical and chemical properties at higher sintering temperatures (950°C and 1050°C)                                                                                                                 |
| Lavrinenko et al., 2018 [57]    | Coal tailings (0-40)       | Clay mixture              | S (0.43) from tailings and S (0.15) from tailings:clay mix | bricks                        | Fired 900-1150°C                                                                                | 20 wt% tailings integration increased porosity and consequently heat-insulating properties and decreased shrinkage                                                                                                                                       |
| Stolboushkin et al., 2016 [58]  | Coal tailings (60-100)     | Clay loam                 | not reported                                               | bricks                        | Fired 1000°C                                                                                    | 70-80 wt% of tailings gave high physical and mechanical properties, and, after coal waste secondary processing, generating additional energy for brick factories                                                                                         |
| Stolboushkin et al., 2016a [59] | Coal tailings (70)         | Loam                      | not reported                                               | bricks                        | Fired 600-1200°C                                                                                | Good amount of pyroclastic glass phase for ceramic brick sintering at a temperature between 950-1050°C                                                                                                                                                   |
| Stolboushkin et al., 2016b [60] | Coal tailings (65)         | Loamy clay, crushed glass | not reported                                               | bricks                        | Fired 900-1000°C                                                                                | 65:25:10 ratio of tailings:loam:glass showed advanced physical and mechanical properties by the matrix structure, intensive glass-phase formation, and temperature reduction of the solid-phase sintering                                                |
| Taha et al., 2017 [61]          | Coal tailings (60-100)     | Shale                     | S (0.21)                                                   | bricks                        | Treated coal mine tailings by froth flotation; pressing 6 MPa; Firing mixtures at 1020°C for 5h | Up to 100 wt% treated coal tailing bricks where in agreement with ASTM requirements; higher mechanical strength than reference; leached metals from environmental assessment under limit requirements of Building Material Decree and US-EPA regulations |
| Chen et al., 2011 [62]          | Hematite tailings (77-100) | Clay, Fly ash             | not reported                                               | bricks                        | Fired 980-1030°C for 2h                                                                         | 84:10:6 ratio of tailings:clay:fly ash achieved satisfying technical properties in compliance with China standards for fired common bricks (GB/T5101-2003)                                                                                               |
| Chen et al., 2013 [63]          | Hematite tailings (50-70)  | Kaolin, Quartz sand       | not reported                                               | porcelain red tiles           | Fired 1150-1250°C for 30 min                                                                    | 55-65:25:10-20 ratio of tailings:kaolin:sand integration fired at 1200°C showed satisfying sintering and high                                                                                                                                            |

|                                     |                                              |                                                                                                                               |                                                               |                          |                                                                                                                      |                                                                                                                                                                                                                                                                                                |
|-------------------------------------|----------------------------------------------|-------------------------------------------------------------------------------------------------------------------------------|---------------------------------------------------------------|--------------------------|----------------------------------------------------------------------------------------------------------------------|------------------------------------------------------------------------------------------------------------------------------------------------------------------------------------------------------------------------------------------------------------------------------------------------|
|                                     |                                              |                                                                                                                               |                                                               |                          |                                                                                                                      | crystallinity of the main mineral phases. It also presented low porosity of solid solutions in a dense glassy and crystalline phase, as well as compliance with Chinese standards for ceramic tiles (GB/T4100-2006 2006)                                                                       |
| Zhao et al., 2012 [64]              | Hematite tailings (70)                       | Lime, Sand, Gypsum                                                                                                            | SO <sub>3</sub> (0.24)                                        | bricks                   | Autoclaved at 1.2 MPa for 6 h                                                                                        | 70:15:15 ratio of tailings:lime:sand satisfied Chinese requirement (GB11945-1999) for MU20 autoclaved bricks                                                                                                                                                                                   |
| Salinas-Rodríguez et al., 2017 [65] | Silver-Gold tailings (55-65)                 | Black clay, Aggregates                                                                                                        | not reported                                                  | bricks                   | Fired 1100°C for 1h                                                                                                  | Au-Ag tailings can be used as feldspar substitutes giving similar or better technical properties than those of a conventional brick                                                                                                                                                            |
| Flores-Badillo et al., 2015 [66]    | Silver-Gold tailings (not reported)          | Heavy clays                                                                                                                   | not reported                                                  | roof tiles               | Molding, dried at room temperature, and green sintering                                                              | Up to 55 wt% of Ag-AU tailings showed satisfying grain size distribution and natural colors                                                                                                                                                                                                    |
| Roy et al., 2007 [67]               | Gold tailings (0-80)                         | Red-soil                                                                                                                      | not reported                                                  | bricks                   | Fired 750-950°C for 9h                                                                                               | 45:55 ratio of tailings:red soil assured the required technical criteria for compressive strength, linear shrinkage, and water absorption. Soil-tailing bricks would be 0.85 times the cost of conventional clay bricks                                                                        |
| Yonggang et al., 2011 [68]          | Gold tailings (25-75)                        | Clay mixtures                                                                                                                 | Medium tailings (S= 2.07 wt%) and fine tailings (S= 3.21 wt%) | bricks                   | Press forming (15 Mpa, 8-9 wt% water) and fired 1050°C for 1h                                                        | 75:25 ratio of fine tailings:clay, and 25:75 ratio of medium tailings:clay achieved compressive strength of MU10, with no lime blowing or efflorescence occurring                                                                                                                              |
| Shao et al., 2005 [69]              | Gold tailings (60-65)                        | Alumina, magnesia, and SB2O3 and NH4NO3 as fluxing agents                                                                     | SO <sub>3</sub> (0.38)                                        | glass ceramics           | Glass preparation included melting at 1550°C for 2h, 300°C hot stainless steel plate, annealing furnace 500°C for 1h | Feasible raw material for cordierite-base glass-ceramics showing satisfying mechanical properties comparable with the industrial standard cordierite                                                                                                                                           |
| Belmonte et al., 2018 [70]          | Gold (20-40) and rare-earth (20-40) tailings | Marine clay                                                                                                                   | not reported                                                  | bricks                   | Fired at 1000°C for 1h                                                                                               | Open porosities and densities acceptable for brick production but leaching tests (DS/EN 12457-1) showed high mobility of As, Pb and Zn, non-compliant with Danish environmental regulations                                                                                                    |
| Peng et al., 2014 [71]              | Tungsten tailings (72)                       | Silica, Alumina, CaCO <sub>3</sub> , Na <sub>2</sub> CO <sub>3</sub>                                                          | not reported                                                  | glass ceramics and tiles | Glass preparation melting at 1400°C for 3h, nucleation for 2h followed by melting 950-1100°C for 2h                  | Gehlenite-hedenbergite glass-ceramics prepared from tungsten tailings showed proper crystal structure and high performance at 1050°C                                                                                                                                                           |
| Li et al., 2020 [72]                | Tungsten tailings (not reported)             | SiO <sub>2</sub> , Na <sub>2</sub> CO <sub>3</sub> , CaO, Al <sub>2</sub> O <sub>3</sub> , BaO, B <sub>2</sub> O <sub>3</sub> | not reported                                                  | glass ceramics           | Tailings were calcined at 600°C for 2h and glass preparation included melting at 1530°C for 2h                       | Glass-ceramic fired at 950°C for 2h showed good technical properties and moderated acid resistance and lower alkaline resistance. The prepared glass ceramics with tungsten tailings were below Chinese leaching limits (GB 5085.3-2007) and can be considered as non-toxic to the environment |

|                          |                                  |                                                                                                                                                                               |                        |                      |                                                                     |                                                                                                                                                                                                                                                                 |
|--------------------------|----------------------------------|-------------------------------------------------------------------------------------------------------------------------------------------------------------------------------|------------------------|----------------------|---------------------------------------------------------------------|-----------------------------------------------------------------------------------------------------------------------------------------------------------------------------------------------------------------------------------------------------------------|
| Wu et al., 2016 [73]     | Tungsten tailings (100)          | -                                                                                                                                                                             | S (0.18)               | floor and wall tiles | Fired 1000-1100°C for 1h and 1050°C from 0-2h                       | Pure tungsten tiles showed good sintering properties at temperatures below 1050°C, excellent properties are achieved at firing temperature of 1050°C for 1h. Recycling W tailings at low sintering provide a cost-effective solution for high strength ceramics |
| Das et al., 1996 [74]    | Iron ore tailings (not reported) | Fly ash, blast furnace slag + alumina, aluminosilicates (additives)                                                                                                           | not reported           | floor and wall tiles | Vitrification                                                       | Tiles showed high strength and hardness compared to conventional tiles and conform with European Standards. Energy and cost efficiency were also achieved                                                                                                       |
| Das, et al., 2000 [75]   | Iron ore tailings (30-50)        | Clay + fluxing minerals                                                                                                                                                       | not reported           | floor and wall tiles | Air-fired 1060-1250°C                                               | Up to 40 wt% of silica-rich iron tailings showed high hardness and strength, comparable to EN standards. Cost-effective solution                                                                                                                                |
| Das et al., 2012 [76]    | Iron ore tailings (45-60)        | Clay, Feldspar                                                                                                                                                                | not reported           | floor and wall tiles | Fired 1100-1150°C for 1h                                            | Tiles fired at 1150°C showed high strength. Fine iron tailing and its strong fluxing action, there is less energy consumed compared to conventional tiles processing                                                                                            |
| Jian et al., 2011[77]    | Iron ore tailings (not reported) | Rock waste                                                                                                                                                                    | SO <sub>3</sub> (0.2)  | wall materials       | Sintering 850-950°C                                                 | High plasticity achieved in vacuum extruded mold can lead to shrinkage cracking. Water absorption, apparent porosity, and bulk density did not change significantly                                                                                             |
| Li et al., 2019 [78]     | Iron ore tailings (not reported) | Acrylamide (AM) and N, N'-Methylene-bis-acrylamide (MBAM), Tetramethylethylenediamine (TEMED), ammonium persulfate (APS) + Lauryl alcohol, and sodium dodecyl sulfonate (SDS) | not reported           | porous bricks        | Hydrous foam-gel casting method and sintering 1070-1120°C for 3-11h | High strength and low thermal conductivity are achieved in porous bricks. Relationship between compressive strength and porosity of porous bricks matches the Gibson equation                                                                                   |
| Mendes et al., 2019 [79] | Iron ore tailings (0-50)         | Yellow clay                                                                                                                                                                   | SO <sub>3</sub> (1.44) | bricks               | Firing 850°C for 3h                                                 | Incorporation of iron tailings gave good mechanical properties, decreased water absorption, apparent porosity, and firing shrinkage. Another experimental design is recommended to meet all criteria                                                            |

|                               |                                      |                                |                         |                       |                                                                                                               |                                                                                                                                                                                                                                                                               |
|-------------------------------|--------------------------------------|--------------------------------|-------------------------|-----------------------|---------------------------------------------------------------------------------------------------------------|-------------------------------------------------------------------------------------------------------------------------------------------------------------------------------------------------------------------------------------------------------------------------------|
| Marabini et al., 1998 [80]    | Chromite (70) and talc (60) tailings | Basalt                         | not reported            | glass ceramics        | Melting 1350°C, 600°C steel plate and crystallization 800°C for 6h                                            | Good hardness and mechanical strength as well as resistance to chemical attack due to immobilization of heavy metals in crystalline phases                                                                                                                                    |
| Fang, et al., 2011 [81]       | Copper tailings (40-88)              | River sand, Sand powder, Lime  | SO <sub>3</sub> (1.79)  | bricks                | Autoclaved at 20 MPa, at 170-180°C for 5-9h                                                                   | Up to 50 wt% copper tailings integration in autoclaved brick (180°C, 7-9h) have higher strength than required (MU 15 autoclaved brick of GB11945-1999). Radioactivity of the brick was compliant with GB 6566-2001 limitations.                                               |
| Taha et al., 2017a [82]       | Lead (calamine) tailings             | Shale, glass waste             | SO <sub>3</sub> (24.6)  | bricks                | Treated lead tailings by flotation; pressing 6 MPa, firing at 1020°C                                          | Up to 30 wt% of treated lead tailings and 10 wt% of glass waste incorporation in shale bricks showed suitable physical and mechanical properties. However, leaching tests (TCLP) on fired bricks showed high mobility of Pb, above the established limit.                     |
| Veiga Simão et al., 2021 [83] | Copper-lead-zinc tailings (5-10)     | Clay mixtures                  | S (9.6)                 | roof tiles and blocks | 65°C industrial drying, roof tiles (fired at 985°C and 1000°C for 2h) and blocks (fired at 965°C for 30 min.) | 5 wt% (roof tiles) and 10 wt% (blocks) integration of Cu-Pb-Zn tailings arise technical and aesthetical issues. Tailing material cannot be used as non-shaped building material (aggregates) due to the high leachability of Cd, Cu, Ni, Pb, and Zn (above regulation limits) |
| Liu et al., 2017 [84]         | Lead-zinc tailings (30-70)           | Fly ash                        | SO <sub>3</sub> (18.96) | porous ceramics       | Tailings and fly ash calcined at 120°C, pressed mix at 20 MPa, fired 1200°C for 2h in air-atmosphere          | Up to 40 wt% of Pb-Zn tailings improved chemical stability due to the formation of more glass phase content                                                                                                                                                                   |
| Veiga Simão et al., 2021 [83] | Lead-zinc tailings (5-10)            | Clay mixtures                  | S (0.01)                | roof tiles and blocks | 65°C industrial drying, roof tiles (fired at 985°C and 1000°C for 2h) and Blocks (fired at 965°C for 30 min.) | 5 wt% (roof tiles) and 10 wt% (blocks) integration of poor Pb-Zn tailings gave comparable technical, aesthetical, and chemical properties to the standard. Tailing material can also be used as non-shaped building material (aggregates) as it follows regulation limits     |
| He et al., 2012 [85]          | Niobium-tantalum tailings (77-82)    | Cao, ZnO, BaO                  | not reported            | glass ceramics        | Heating at 600°C for 2h in air, followed by melting at 1500°C for 2-3h.                                       | With CaO the intensity of crystal diffraction peaks increase. Glass ceramics prepared with a two-step sintering present density and sintering quality                                                                                                                         |
| Baowei et al., 2013 [86]      | Rare-earth element tailings (10-50)  | Fly ash, hematite, and alumina | not reported            | glass ceramics        | Melting at 1470°C for 4h, followed by annealing at 600°C for 3h.                                              | 50:20 ratio of tailings:fly ash excellent overall performance with high chemical resistance, viable for use as an engineering material                                                                                                                                        |

## References

- [1] K. Wu, H. Shi, L. Xu, X. Guo, G. De Schutter, and M. Xu, "Influence of heavy metals on the early hydration of calcium sulfoaluminate," *J. Therm. Anal. Calorim.*, vol. 115, no. 2, pp. 1153–1162, 2014.
- [2] C. A. Luz, J. Pera, M. Cheriaf, and J. C. Rocha, "Behaviour of calcium sulfoaluminate cement in presence of high concentrations of chromium salts," *Cem. Concr. Res.*, vol. 37, no. 4, pp. 624–629, 2007.
- [3] J. Zhu, Y. Chen, L. Zhang, K. Yang, X. Guan, and R. Zhao, "Insights on substitution preference of pb ions in sulfoaluminate cement clinker phases," *Materials (Basel)*, vol. 14, no. 1, pp. 1–10, 2021.
- [4] J. D. Zea-Garcia, I. Santacruz, M. A. G. Aranda, and A. G. De la Torre, "Alite-belite-ye'elimite cements: Effect of dopants on the clinker phase composition and properties," *Cem. Concr. Res.*, vol. 115, no. July 2018, pp. 192–202, 2019.
- [5] S. Berger *et al.*, "Stabilization of ZnCl<sub>2</sub>-containing wastes using calcium sulfoaluminate cement: Leaching behaviour of the solidified waste form, mechanisms of zinc retention," *J. Hazard. Mater.*, vol. 194, pp. 268–276, 2011.
- [6] C. Li, M. Wu, and W. Yao, "Effect of coupled B/Na and B/Ba doping on hydraulic properties of belite-ye'elimite-ferrite cement," *Constr. Build. Mater.*, vol. 208, pp. 23–35, 2019.
- [7] R. Berardi, R. Cioffi, and L. Santoro, "Matrix stability and leaching behaviour in ettringite-based stabilization systems doped with heavy metals," *Waste Manag.*, vol. 17, no. 8, pp. 535–540, 1998.
- [8] S. Peysson, J. Péra, and M. Chabannet, "Immobilization of heavy metals by calcium sulfoaluminate cement," *Cem. Concr. Res.*, vol. 35, no. 12, pp. 2261–2270, 2005.
- [9] W. Chen, X. Ling, Q. Li, B. Yuan, B. Li, and H. Ma, "Experimental evidence on formation of ulexite in sulfoaluminate cement paste mixed with high concentration borate solution and its retarding effects," *Constr. Build. Mater.*, vol. 215, pp. 777–785, 2019.
- [10] P. Yan, "Hydration of Sr-and Ba-bearing sulphoaluminates in the presence of sulphates," *Adv. Cem. Res.*, vol. 5, no. 18, pp. 65–69, 1993.
- [11] D. Stephan, R. Mallmann, D. Knöfel, and R. Härdtl, "High intakes of Cr, Ni, and Zn in clinker Part II. Influence on the hydration properties," *Cem. Concr. Res.*, vol. 29, no. 12, pp. 1959–1967, 1999.
- [12] S. Ma, X. Shen, X. Gong, and B. Zhong, "Influence of CuO on the formation and coexistence of 3CaO·SiO<sub>2</sub> and 3CaO·3Al<sub>2</sub>O<sub>3</sub>·CaSO<sub>4</sub> minerals," *Cem. Concr. Res.*, vol. 36, no. 9, pp. 1784–1787, 2006.
- [13] S. Berger, C. Cau Dit Coumes, P. Le Bescop, and D. Damidot, "Hydration of calcium sulfoaluminate cement by a ZnCl<sub>2</sub> solution: Investigation at early age," *Cem. Concr. Res.*, vol. 39, no. 12, pp. 1180–1187, 2009.
- [14] J. B. Champenois *et al.*, "Influence of sodium borate on the early age hydration of calcium sulfoaluminate cement," *Cem. Concr. Res.*, vol. 70, pp. 83–93, 2015.
- [15] C. Cau Dit Coumes, M. Dhoury, J. B. Champenois, C. Mercier, and D. Damidot, "Physico-chemical mechanisms involved in the acceleration of the hydration of calcium sulfoaluminate cement by lithium ions," *Cem. Concr. Res.*, vol. 96, pp. 42–51, 2017.
- [16] M. Niu, G. Li, Y. Wang, Q. Li, L. Han, and Z. Song, "Comparative study of immobilization and mechanical properties of sulfoaluminate cement and ordinary Portland cement with different heavy metals," *Constr. Build. Mater.*, vol. 193, pp. 332–343, 2018.
- [17] J. S. Ndzila, S. Liu, G. Jing, S. Wang, and Z. Ye, "The effect of Fe<sup>3+</sup> ion substitution on the crystal structure of Ye'elimite," *Ceram. - Silikaty*, vol. 64, no. 1, pp. 18–28, 2020.
- [18] J. Kleib, G. Aouad, N. Khalil, and M. Zakhour, "Incorporation of zinc in calcium sulfoaluminate cement clinker," *Adv. Cem. Res.*, pp. 1–7, Oct. 2020.
- [19] H. Deng, X. Wei, S. Liu, S. Li, and X. Cai, "Influence of different Lithium compounds on hydration and mechanical properties of calcium sulfoaluminate cement," *Materials (Basel)*, vol. 13, no. 16, Aug. 2020.
- [20] P. Zhao *et al.*, "Hydration mechanisms of Ba-doped ye'elimite: Effect of Ba/Ca ratio on hydration behavior," *Constr. Build. Mater.*, vol. 264, Dec. 2020.

- [21] Y. Huang *et al.*, “Phosphogypsum as a component of calcium sulfoaluminate cement: Hazardous elements immobilization, radioactivity and performances,” *J. Clean. Prod.*, vol. 248, p. 119287, 2020.
- [22] Y. W. Choi, Y. J. Kim, O. Choi, K. M. Lee, and M. Lachemi, “Utilization of tailings from tungsten mine waste as a substitution material for cement,” *Constr. Build. Mater.*, vol. 23, pp. 2481–2486, 2009.
- [23] K. Peng, H. Yang, and J. Ouyang, “Tungsten tailing powders activated for use as cementitious material,” *Powder Technol.*, vol. 286, pp. 678–683, 2015.
- [24] Z. Guo, Q. Feng, W. Wang, Y. Huang, J. Deng, and Z. Xu, “Study on Flotation Tailings of Kaolinite-type Pyrite when Used as Cement Admixture and Concrete Admixture,” *Procedia Environ. Sci.*, vol. 31, pp. 644–652, 2016.
- [25] F. Vargas and M. Lopez, “Development of a new supplementary cementitious material from the activation of copper tailings: Mechanical performance and analysis of factors,” *J. Clean. Prod.*, vol. 182, pp. 427–436, 2018.
- [26] M. A. T. Simonsen, S. Solismaa, H. K. Hansen, and P. E. Jensen, “Evaluation of mine tailings’ potential as supplementary cementitious materials based on chemical, mineralogical and physical characteristics,” *Waste Manag.*, vol. 102, pp. 710–721, 2020.
- [27] L. F. de Magalhães, S. França, M. dos S. Oliveira, R. A. F. Peixoto, S. A. L. Bessa, and A. C. da S. Bezerra, “Iron ore tailings as a supplementary cementitious material in the production of pigmented cements,” *J. Clean. Prod.*, vol. 274, 2020.
- [28] S. Ramanathan, P. Perumal, M. Illikainen, and P. Suraneni, “Mechanically activated mine tailings for use as supplementary cementitious materials,” *RILEM Tech. Lett.*, vol. 6, pp. 61–69, 2021.
- [29] L. Zhang, S. Ahmari, and J. Zhang, “Synthesis and characterization of fly ash modified mine tailings-based geopolymers,” *Constr. Build. Mater.*, vol. 25, no. 9, pp. 3773–3781, Sep. 2011.
- [30] S. Ahmari and L. Zhang, “Utilization of cement kiln dust (CKD) to enhance mine tailings-based geopolymer bricks,” *Constr. Build. Mater.*, vol. 40, pp. 1002–1011, Mar. 2013.
- [31] T. Falayi, “A comparison between fly ash- and basic oxygen furnace slag-modified gold mine tailings geopolymers,” *Int. J. Energy Environ. Eng.*, vol. 11, no. 2, pp. 207–217, Jun. 2020.
- [32] P. Duan, C. Yan, W. Zhou, and D. Ren, “Development of fly ash and iron ore tailing based porous geopolymer for removal of Cu(II) from wastewater,” *Ceram. Int.*, vol. 42, no. 12, pp. 13507–13518, Sep. 2016.
- [33] J. Kiventerä, L. Golek, J. Yliniemi, V. Ferreira, J. Deja, and M. Illikainen, “Utilization of sulphidic tailings from gold mine as a raw material in geopolymerization,” *Int. J. Miner. Process.*, vol. 149, pp. 104–110, 2016.
- [34] J. Kiventerä, I. Lancellotti, M. Catauro, F. D. Poggetto, C. Leonelli, and M. Illikainen, “Alkali activation as new option for gold mine tailings inertization,” *J. Clean. Prod.*, vol. 187, pp. 76–84, 2018.
- [35] J. Kiventerä, H. Sreenivasan, C. Cheeseman, P. Kinnunen, and M. Illikainen, “Immobilization of sulfates and heavy metals in gold mine tailings by sodium silicate and hydrated lime,” *J. Environ. Chem. Eng.*, vol. 6, no. 5, pp. 6530–6536, 2018.
- [36] H. Jiang, Z. Qi, E. Yilmaz, J. Han, J. Qiu, and C. Dong, “Effectiveness of alkali-activated slag as alternative binder on workability and early age compressive strength of cemented paste backfills,” *Constr. Build. Mater.*, vol. 218, pp. 689–700, Sep. 2019.
- [37] F. Cihangir, B. Ercikdi, A. Kesimal, A. Turan, and H. Deveci, “Utilisation of alkali-activated blast furnace slag in paste backfill of high-sulphide mill tailings: Effect of binder type and dosage,” *Miner. Eng.*, vol. 30, pp. 33–43, 2012.
- [38] L. Manjarrez, A. Nikvar-Hassani, R. Shadnia, and L. Zhang, “Experimental Study of Geopolymer Binder Synthesized with Copper Mine Tailings and Low-Calcium Copper Slag,” *J. Mater. Civ. Eng.*, vol. 31, no. 8, p. 04019156, Aug. 2019.
- [39] S. Ahmari, K. Parameswaran, and L. Zhang, “Alkali Activation of Copper Mine Tailings and Low-Calcium Flash-Furnace Copper Smelter Slag,” *J. Mater. Civ. Eng.*, vol. 27, no. 6, p. 04014193, Jun. 2015.

- [40] J. Wu, J. Li, F. Rao, and W. Yin, "Characterization of Slag Reprocessing Tailings-Based Geopolymers in Marine Environment," *Minerals*, vol. 10, no. 9, p. 832, Sep. 2020.
- [41] Q. Wan, F. Rao, S. Song, C. A. Leon-Patino, Y. Ma, and W. Yin, "Consolidation of mine tailings through geopolymerization at ambient temperature," *J. Am. Ceram. Soc.*, vol. 102, no. 5, pp. 2451–2461, May 2019.
- [42] H. Paiva, J. Yliniemi, M. Illikainen, F. Rocha, and V. M. Ferreira, "Mine tailings geopolymers as awaste management solution for a more sustainable habitat," *Sustain.*, vol. 11, no. 4, 2019.
- [43] X. Ren, L. Zhang, D. Ramey, B. Waterman, and S. Ormsby, "Utilization of aluminum sludge (AS) to enhance mine tailings-based geopolymer," *J. Mater. Sci.*, vol. 50, no. 3, pp. 1370–1381, Feb. 2015.
- [44] K. do Carmo e Silva Defaveri, L. F. dos Santos, J. M. Franco de Carvalho, R. A. F. Peixoto, and G. J. Brigolini, "Iron ore tailing-based geopolymer containing glass wool residue: A study of mechanical and microstructural properties," *Constr. Build. Mater.*, vol. 220, pp. 375–385, Sep. 2019.
- [45] G. Kastiukas, X. Zhou, and J. Castro-Gomes, "Preparation Conditions for the Synthesis of Alkali-Activated Binders Using Tungsten Mining Waste," *J. Mater. Civ. Eng.*, vol. 29, no. 10, p. 04017181, Oct. 2017.
- [46] J. P. J. Aseniero, E. M. Opiso, M. H. T. Banda, and C. B. Tabelin, "Potential utilization of artisanal gold-mine tailings as geopolymeric source material: preliminary investigation," *SN Appl. Sci.*, vol. 1, no. 1, p. 35, Jan. 2019.
- [47] L. Manjarrez and L. Zhang, "Utilization of Copper Mine Tailings as Road Base Construction Material through Geopolymerization," *J. Mater. Civ. Eng.*, vol. 30, no. 9, p. 04018201, Sep. 2018.
- [48] S. Ahmari and L. Zhang, "Production of eco-friendly bricks from copper mine tailings through geopolymerization," *Constr. Build. Mater.*, vol. 29, pp. 323–331, Apr. 2012.
- [49] F. Pacheco-Torgal, J. Castro-Gomes, and S. Jalali, "Geopolymeric binder using tungsten mine waste: preliminary investigation," in *Proceedings of geopolymer 2005 world congress*, 2005, pp. 93–8.
- [50] F. Pacheco-Torgal, J. Castro-Gomes, and S. Jalali, "Properties of tungsten mine waste geopolymeric binder," *Constr. Build. Mater.*, vol. 22, no. 6, pp. 1201–1211, Jun. 2008.
- [51] F. Pacheco-Torgal, J. P. Castro-Gomes, and S. Jalali, "Adhesion characterization of tungsten mine waste geopolymeric binder. Influence of OPC concrete substrate surface treatment," *Constr. Build. Mater.*, vol. 22, no. 3, pp. 154–161, Mar. 2008.
- [52] F. Pacheco-Torgal, J. P. Castro-Gomes, and S. Jalali, "Investigations on mix design of tungsten mine waste geopolymeric binder," *Constr. Build. Mater.*, vol. 22, no. 9, pp. 1939–1949, Sep. 2008.
- [53] M. Falah, R. Obenaus-Emler, P. Kinnunen, and M. Illikainen, "Effects of Activator Properties and Curing Conditions on Alkali-Activation of Low-Alumina Mine Tailings," *Waste and Biomass Valorization*, vol. 11, no. 9, pp. 5027–5039, Sep. 2020.
- [54] B. Koohestani, P. Mokhtari, E. Yilmaz, F. Mahdipour, and A. K. Darban, "Geopolymerization mechanism of binder-free mine tailings by sodium silicate," *Constr. Build. Mater.*, vol. 268, p. 121217, Jan. 2021.
- [55] G. Yao, Q. Liu, J. Wang, P. Wu, and X. Lyu, "Effect of mechanical grinding on pozzolanic activity and hydration properties of siliceous gold ore tailings," *J. Clean. Prod.*, vol. 217, pp. 12–21, Apr. 2019.
- [56] E. Abi, F. Oruç, and E. Sabha, "Utilization of Waste Clay from Coal Preparation Tailings for Brick Production," *Ore Dress.*, no. January 2011, 2011.
- [57] A. A. Lavrinenko, N. Y. Svechnikova, N. S. Konovnitsyna, E. A. Igumensheva, O. V Kuklina, and A. I. Khasanzyanova, "Utilization of Bituminous Coal Flotation Wastes in the Manufacture of Ceramic Brick," *Solid Fuel Chem.*, vol. 52, no. 6, pp. 406–410, 2018.
- [58] A. Y. Stolboushkin, A. I. Ivanov, and O. A. Fomina, "Use of Coal-Mining and Processing Wastes in Production of Bricks and Fuel for Their Burning," in *Procedia Engineering*, 2016, vol. 150, pp. 1496–1502.
- [59] A. Y. Stolboushkin, A. I. Ivanov, V. A. Syromyasov, and O. A. Fomina, "A study on sintering of ceramic bricks made from waste coal," *{IOP} Conf. Ser. Earth Environ. Sci.*, vol. 45, p. 12018, Oct. 2016.

- [60] A. Stolboushkin, O. Fomina, and A. Fomin, "The investigation of the matrix structure of ceramic brick made from carbonaceous mudstone tailings," *IOP Conf. Ser. Mater. Sci. Eng.*, vol. 124, p. 012143, Apr. 2016.
- [61] Y. Taha, M. Benzaazoua, R. Hakkou, and M. Mansori, "Coal mine wastes recycling for coal recovery and eco-friendly bricks production," *Miner. Eng.*, vol. 107, pp. 123–138, Jun. 2017.
- [62] Y. Chen, Y. Zhang, T. Chen, Y. Zhao, and S. Bao, "Preparation of eco-friendly construction bricks from hematite tailings," *Constr. Build. Mater.*, vol. 25, no. 4, pp. 2107–2111, Apr. 2011.
- [63] Y. Chen, Y. Zhang, T. Chen, T. Liu, and J. Huang, "Preparation and characterization of red porcelain tiles with hematite tailings," *Constr. Build. Mater.*, vol. 38, pp. 1083–1088, Jan. 2013.
- [64] Y. Zhao, Y. Zhang, T. Chen, Y. Chen, and S. Bao, "Preparation of high strength autoclaved bricks from hematite tailings," *Constr. Build. Mater.*, vol. 28, no. 1, pp. 450–455, Mar. 2012.
- [65] V. R.-L. and E. C.-S. E. Salinas-Rodríguez, J. Flores-Badillo, J. Hernández-Ávila, M. Vargas-Ramírez, J.A. Flores-Hernández, "Design and Production of a New Construction Material (Bricks), Using Mining Tailings," *Int. J. Eng. Sci. Res.*, vol. 6, no. 6, pp. 225–238, 2017.
- [66] J. Flores-Badillo, J. H. Ávila, F. P. Cardona, N. Y. T. Pineda, and J. A. O. Santos, "Developing Alternative Industrial Materials from Mining Waste," in *Engineering Solutions for Sustainability: Materials and Resources II*, J. W. Fergus, B. Mishra, D. Anderson, E. A. Sarver, and N. R. Neelameggham, Eds. Cham: Springer International Publishing, 2016, pp. 119–125.
- [67] S. Roy, G. R. Adhikari, and R. N. Gupta, "Use of gold mill tailings in making bricks: a feasibility study," *Waste Manag. & Res.*, vol. 25, no. 5, pp. 475–482, 2007.
- [68] Y. Yonggang, Z. Shenhong, L. Qiuyi, Y. Benju, and C. Yu, "Research on Making Fired Bricks with Gold Tailings," in *2011 International Conference on Computer Distributed Control and Intelligent Environmental Monitoring*, 2011, pp. 1687–1690.
- [69] H. Shao, K. Liang, F. Peng, F. Zhou, and A. Hu, "Production and properties of cordierite-based glass-ceramics from gold tailings," *Miner. Eng.*, vol. 18, no. 6, pp. 635–637, May 2005.
- [70] L. J. Belmonte, L. M. Ottosen, G. M. Kirkelund, P. E. Jensen, and A. P. Vestbø, "Screening of heavy metal containing waste types for use as raw material in Arctic clay-based bricks," *Environ. Sci. Pollut. Res.*, vol. 25, no. 33, pp. 32831–32843, 2018.
- [71] K. Peng, C. Lv, and H. Yang, "Novel preparation of glass ceramics from amorphized tungsten tailings," *Ceram. Int.*, vol. 40, no. 7 PART B, pp. 10291–10296, Aug. 2014.
- [72] B. Li, Y. Guo, and J. Fang, "Effect of crystallization temperature on glass-ceramics derived from tailings waste," *J. Alloys Compd.*, vol. 838, p. 155503, Oct. 2020.
- [73] T. Wu, T. Y. Liu, Z. Li, X. J. Hao, and A. X. Lu, "Effect of sintering temperature and time on preparation of ceramic tiles made from tungsten tailings," *Adv. Appl. Ceram.*, vol. 115, no. 1, pp. 49–54, 2016.
- [74] S. K. Das, L. K. Singh, and P. R. Rao, "An innovative approach towards utilisation of wastes generated from iron & steel industries," in *Proceedings: NS EWM*, 1996, no. January, pp. 86–93.
- [75] S. K. Das, S. Kumar, and P. Ramachandrarao, "Exploitation of iron ore tailing for the development of ceramic tiles," in *Waste Management*, 2000, vol. 20, no. 8, pp. 725–729.
- [76] S. K. Das, J. Ghosh, A. K. Mandal, N. Singh, and S. Gupta, "Iron Ore Tailing: A Waste Material used in Ceramic Tile Compositions as Alternative Source of Raw Materials," *Trans. Indian Ceram. Soc.*, vol. 71, no. 1, pp. 21–24, 2012.
- [77] S. W. Jian, L. Yuan, Y. Lv, H. B. Tan, X. G. Li, and B. G. Ma, "Study on Sintered Wall Materials Made Use of Iron Tailings and Waste Rock," in *Advances in Civil Engineering and Architecture*, 2011, vol. 243, pp. 7036–7040.
- [78] R. Li, Y. Zhou, C. Li, S. Li, and Z. Huang, "Recycling of industrial waste iron tailings in porous bricks with low thermal conductivity," *Constr. Build. Mater.*, vol. 213, pp. 43–50, Jul. 2019.
- [79] B. C. Mendes *et al.*, "Effect of the Incorporation of Iron Ore Tailings on the Properties of Clay Bricks," in *Characterization of Minerals, Metals, and Materials 2019*, 2019, pp. 617–627.
- [80] A. M. Marabini, P. Plescia, D. Maccari, F. Burrigato, and M. Pelino, "New materials from industrial and mining wastes: Glass-ceramics and glass-and rock-wool fibre," *Int. J. Miner. Process.*, vol. 53,

- no. 1–2, pp. 121–134, Feb. 1998.
- [81] Y. Fang, Y. Gu, Q. Kang, Q. Wen, and P. Dai, “Utilization of copper tailing for autoclaved sand-lime brick,” *Constr. Build. Mater.*, vol. 25, no. 2, pp. 867–872, Feb. 2011.
  - [82] Y. Taha, M. Benzaazoua, M. Mansori, and R. Hakkou, “Recycling Feasibility of Glass Wastes and Calamine Processing Tailings in Fired Bricks Making,” *Waste and Biomass Valorization*, vol. 8, no. 5, pp. 1479–1489, Jul. 2017.
  - [83] F. Veiga Simão, H. Chambart, L. Vandemeulebroeke, and V. Cappuyns, “Incorporation of sulphidic mining waste material in ceramic roof tiles and blocks,” *J. Geochemical Explor.*, vol. 225, p. 106741, Jun. 2021.
  - [84] T. Liu, Y. Tang, L. Han, J. Song, Z. Luo, and A. Lu, “Recycling of harmful waste lead-zinc mine tailings and fly ash for preparation of inorganic porous ceramics,” *Ceram. Int.*, vol. 43, no. 6, pp. 4910–4918, Apr. 2017.
  - [85] F. He, J. Liu, and J. Cheng, “Study on sintered glass ceramics from Nb-Ta tailings,” *Glas. Phys. Chem.*, vol. 38, no. 1, pp. 109–115, 2012.
  - [86] L. Baowei, D. Leibo, Z. Xuefeng, and J. Xiaolin, “Structure and performance of glass-ceramics obtained by Bayan Obo tailing and fly ash,” *J. Non. Cryst. Solids*, vol. 380, pp. 103–108, Nov. 2013.
